# Supplementary material for: Identifying sequence features that drive ribosomal association for lncRNA
Source: PubMed Central journal article supplement (PMC6311901; doi:10.1186/s12864-018-5275-8), 2018-12-31
Supplement: 12864_2018_5275_MOESM1_ESM.pdf [file 12864_2018_5275_MOESM1_ESM.pdf]

## Supplementary materials

- **Figure S1** Context scoring matrix measures the similarity of Kozak sequence (human)
- **Figure S2** Distribution of all feature scores in human
- **Figure S3** Distribution of all feature scores in mouse
- **Figure S4** Correlations ( $r$ ) of features indicates redundant features in mouse
- **Figure S5** Feature selection by using  $\mathcal{L}1$ -logistic regression in mouse
- **Figure S6** Training  $\mathcal{L}1$ -logistic regression model on the dataset of **a** ribo-lncRNAs and mRNAs; **b** noribo-lncRNAs and mRNAs in human
- **Figure S7** Training  $\mathcal{L}1$ -logistic regression model on the dataset of **a** ribo-lncRNAs and mRNAs; **b** noribo-lncRNAs and mRNAs in mouse
- **Table S1.** Sequence features were considered to influence the ribosomal association
- **Table S2.** Low-redundant features in human and mouse

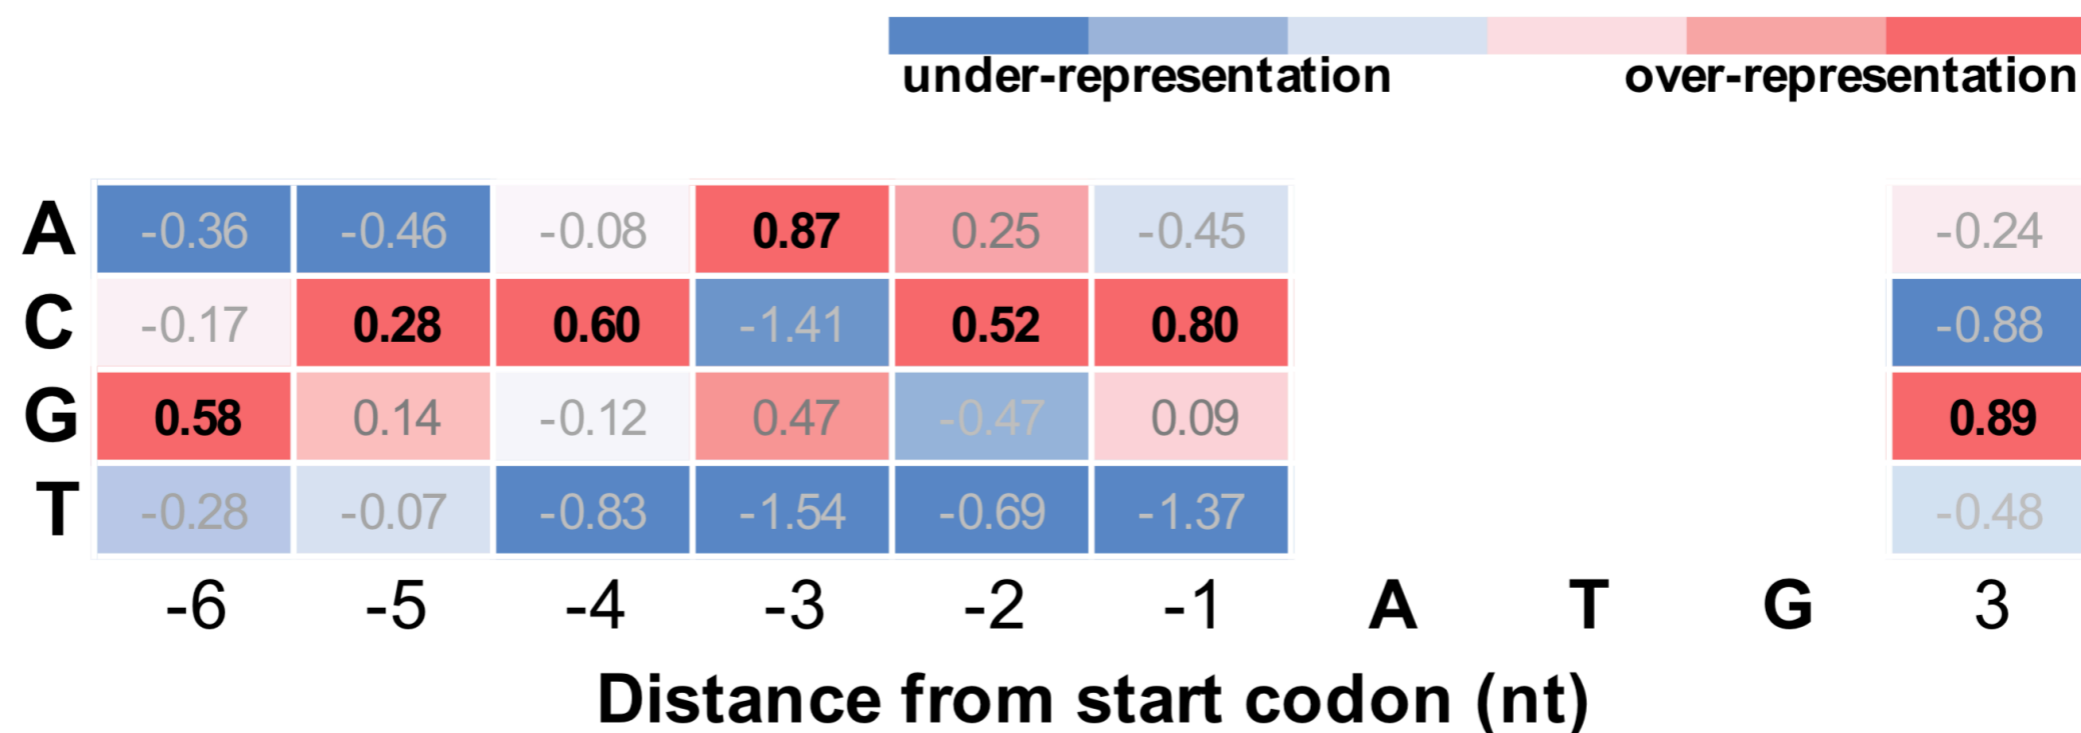

**Figure S1** Context scoring matrix measures the similarity of Kozak sequence (human). We calculated the context scoring matrix from 5,000 CDSs (see “Method”). This indicates a Kozak sequence motif (gcc[a/g]ccATGg) surrounding the start codon.

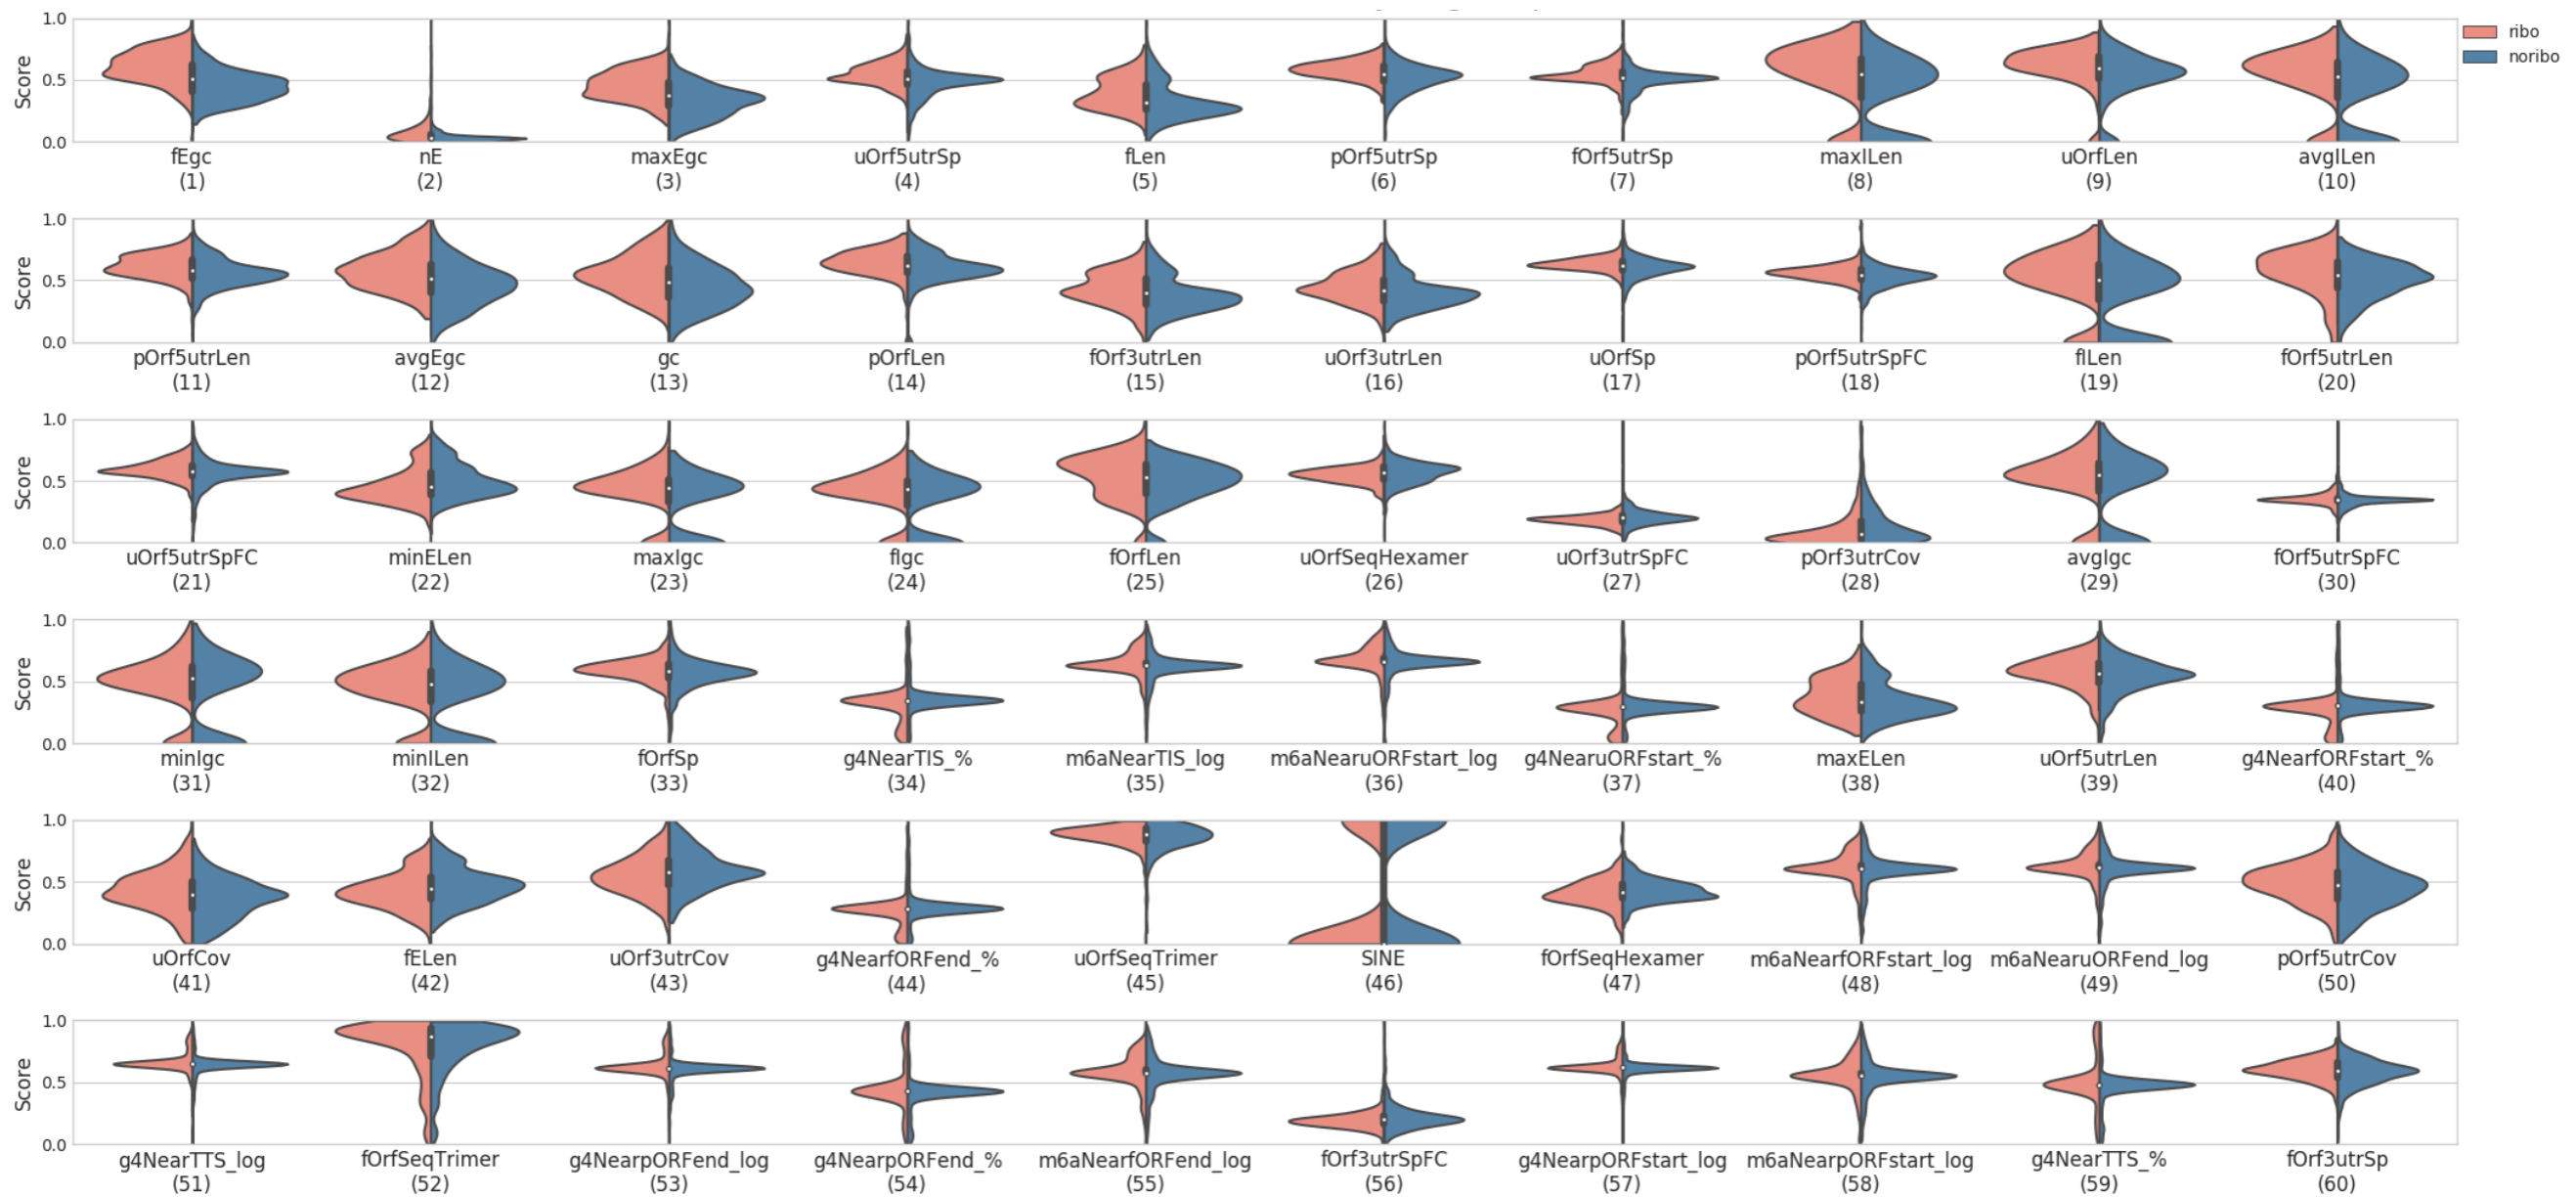

**Figure S2** Distribution of all feature scores in human. Each feature was ranked by  $-\log(\text{KS p-value})$ , in which KS represents two samples Kolmogorov-Smirnov test between ribo-IncRNAs (red) and noribo-IncRNAs (blue).

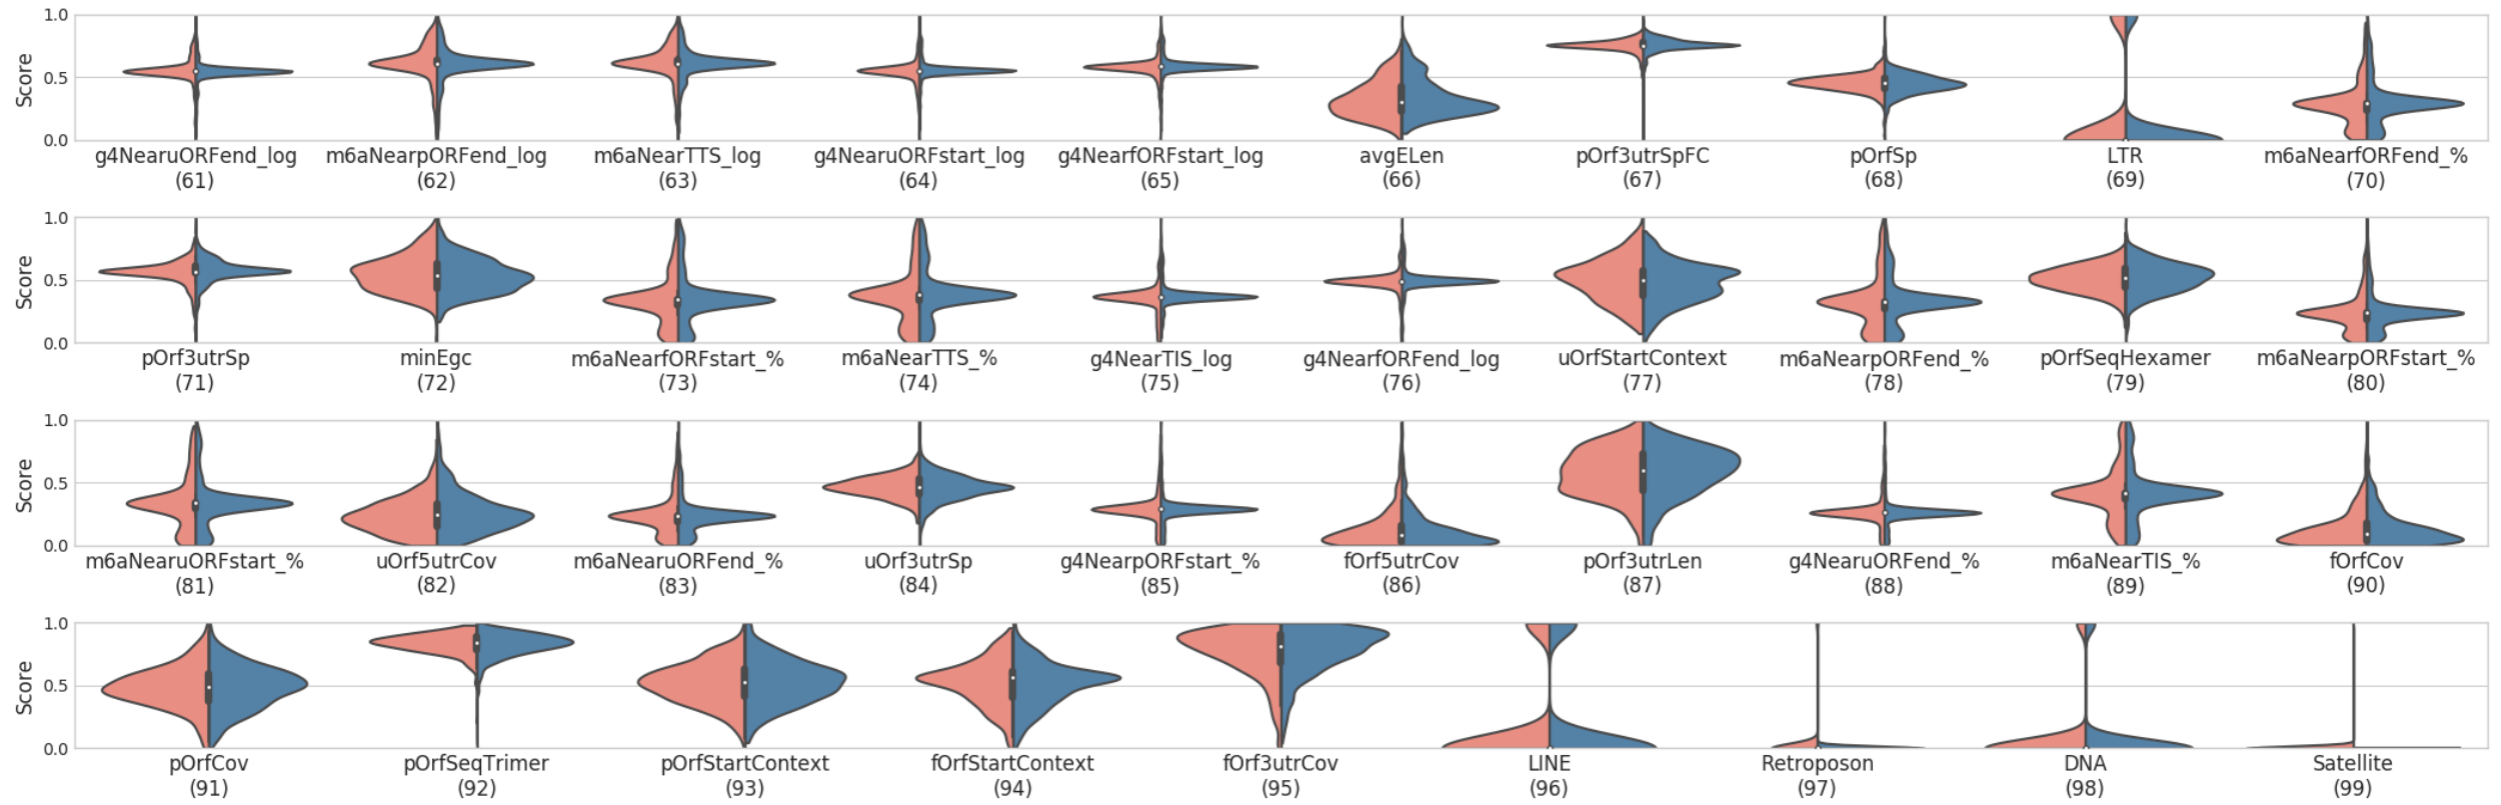

**Figure S2** Distribution of all feature scores in human (continued).

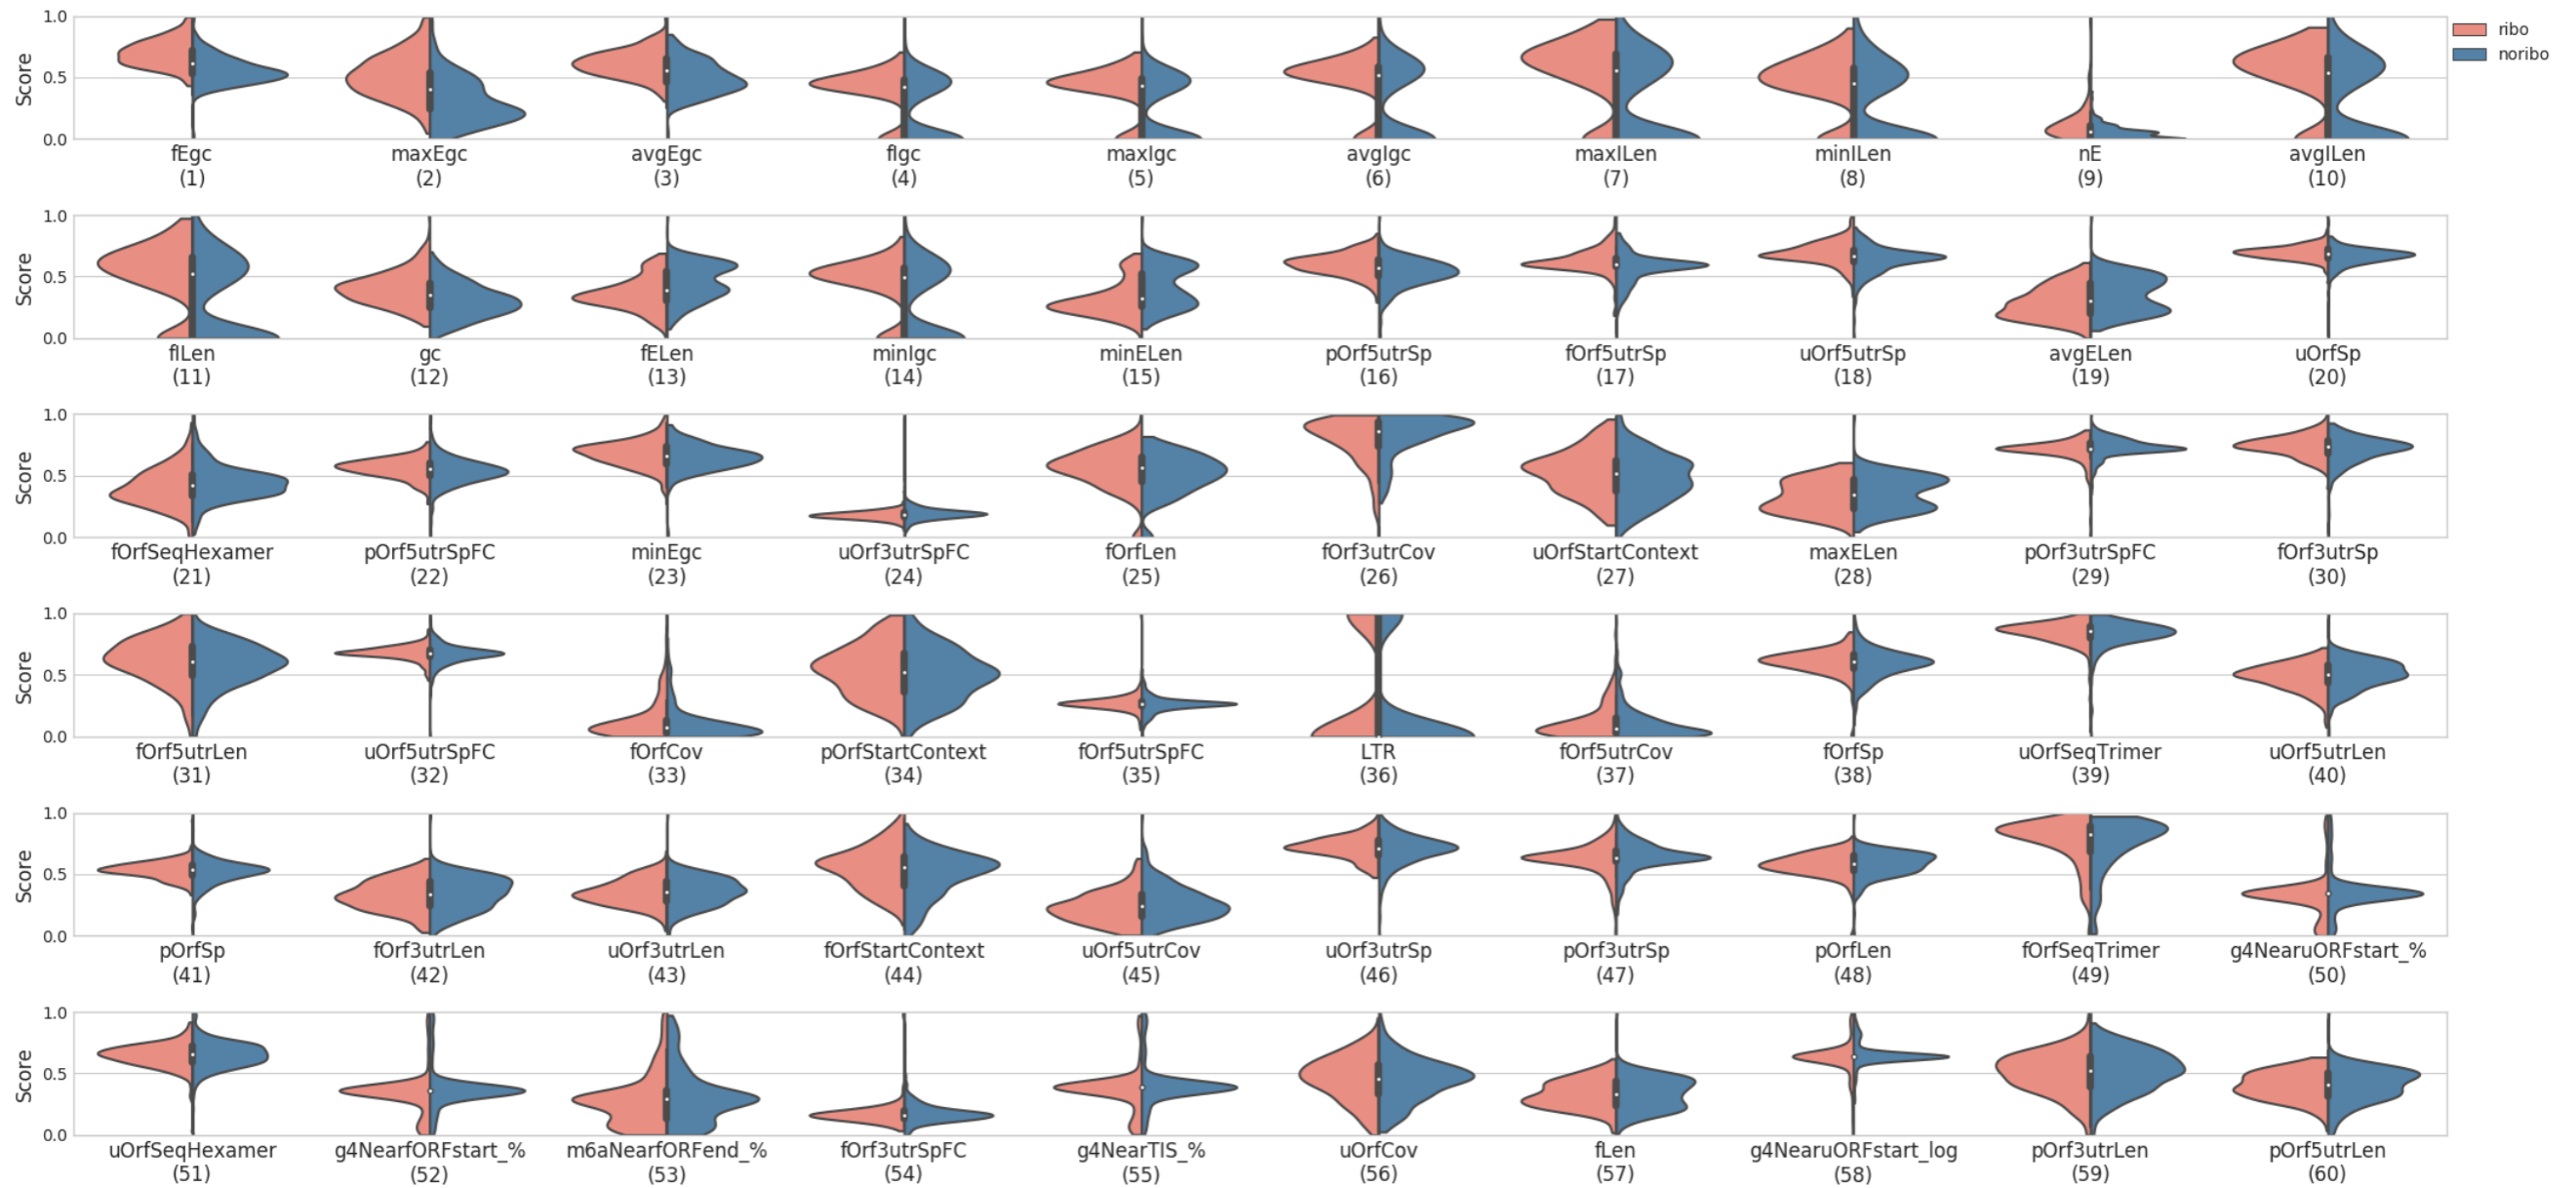

**Figure S3** Distribution of all feature scores in mouse. Each feature was ranked by  $-\log(\text{KS p-value})$ , in which KS represents two samples Kolmogorov-Smirnov test between ribo-lncRNAs (red) and noribo-lncRNAs (blue).

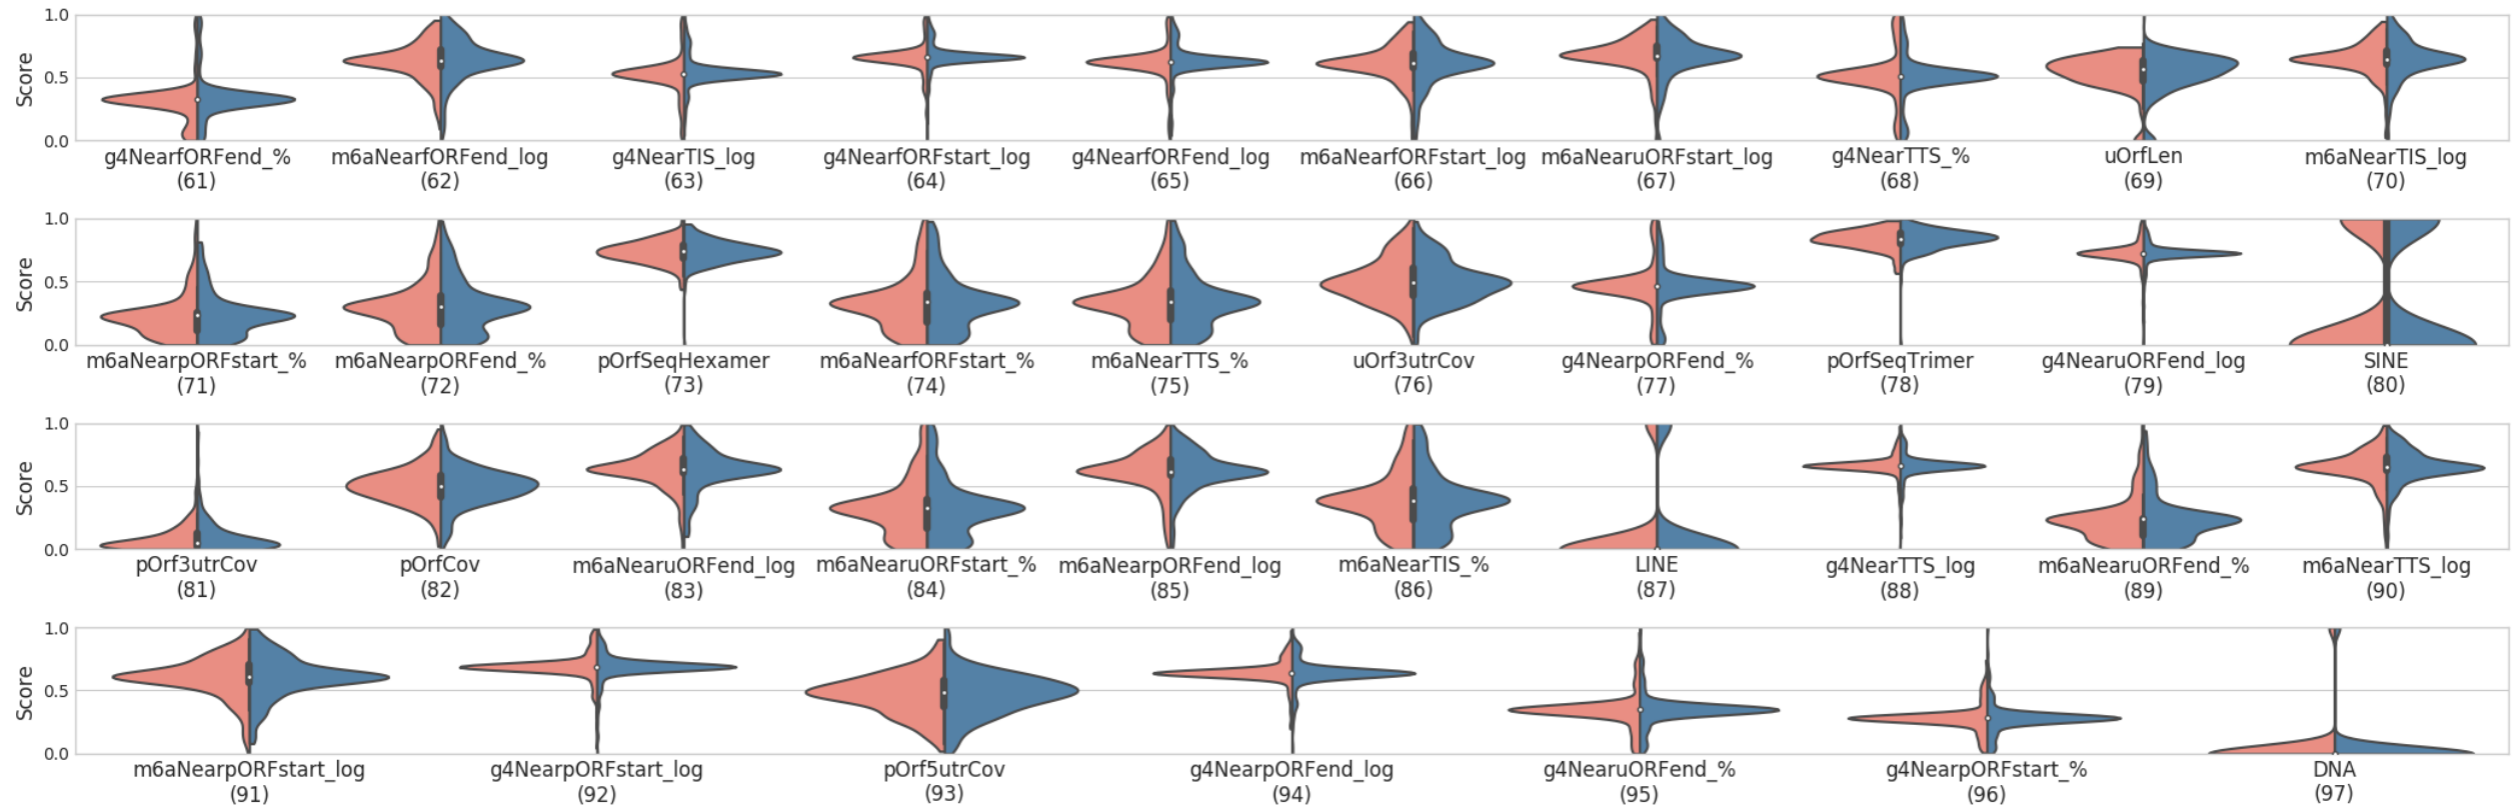

**Figure S3** Distribution of all feature scores in mouse (continued).

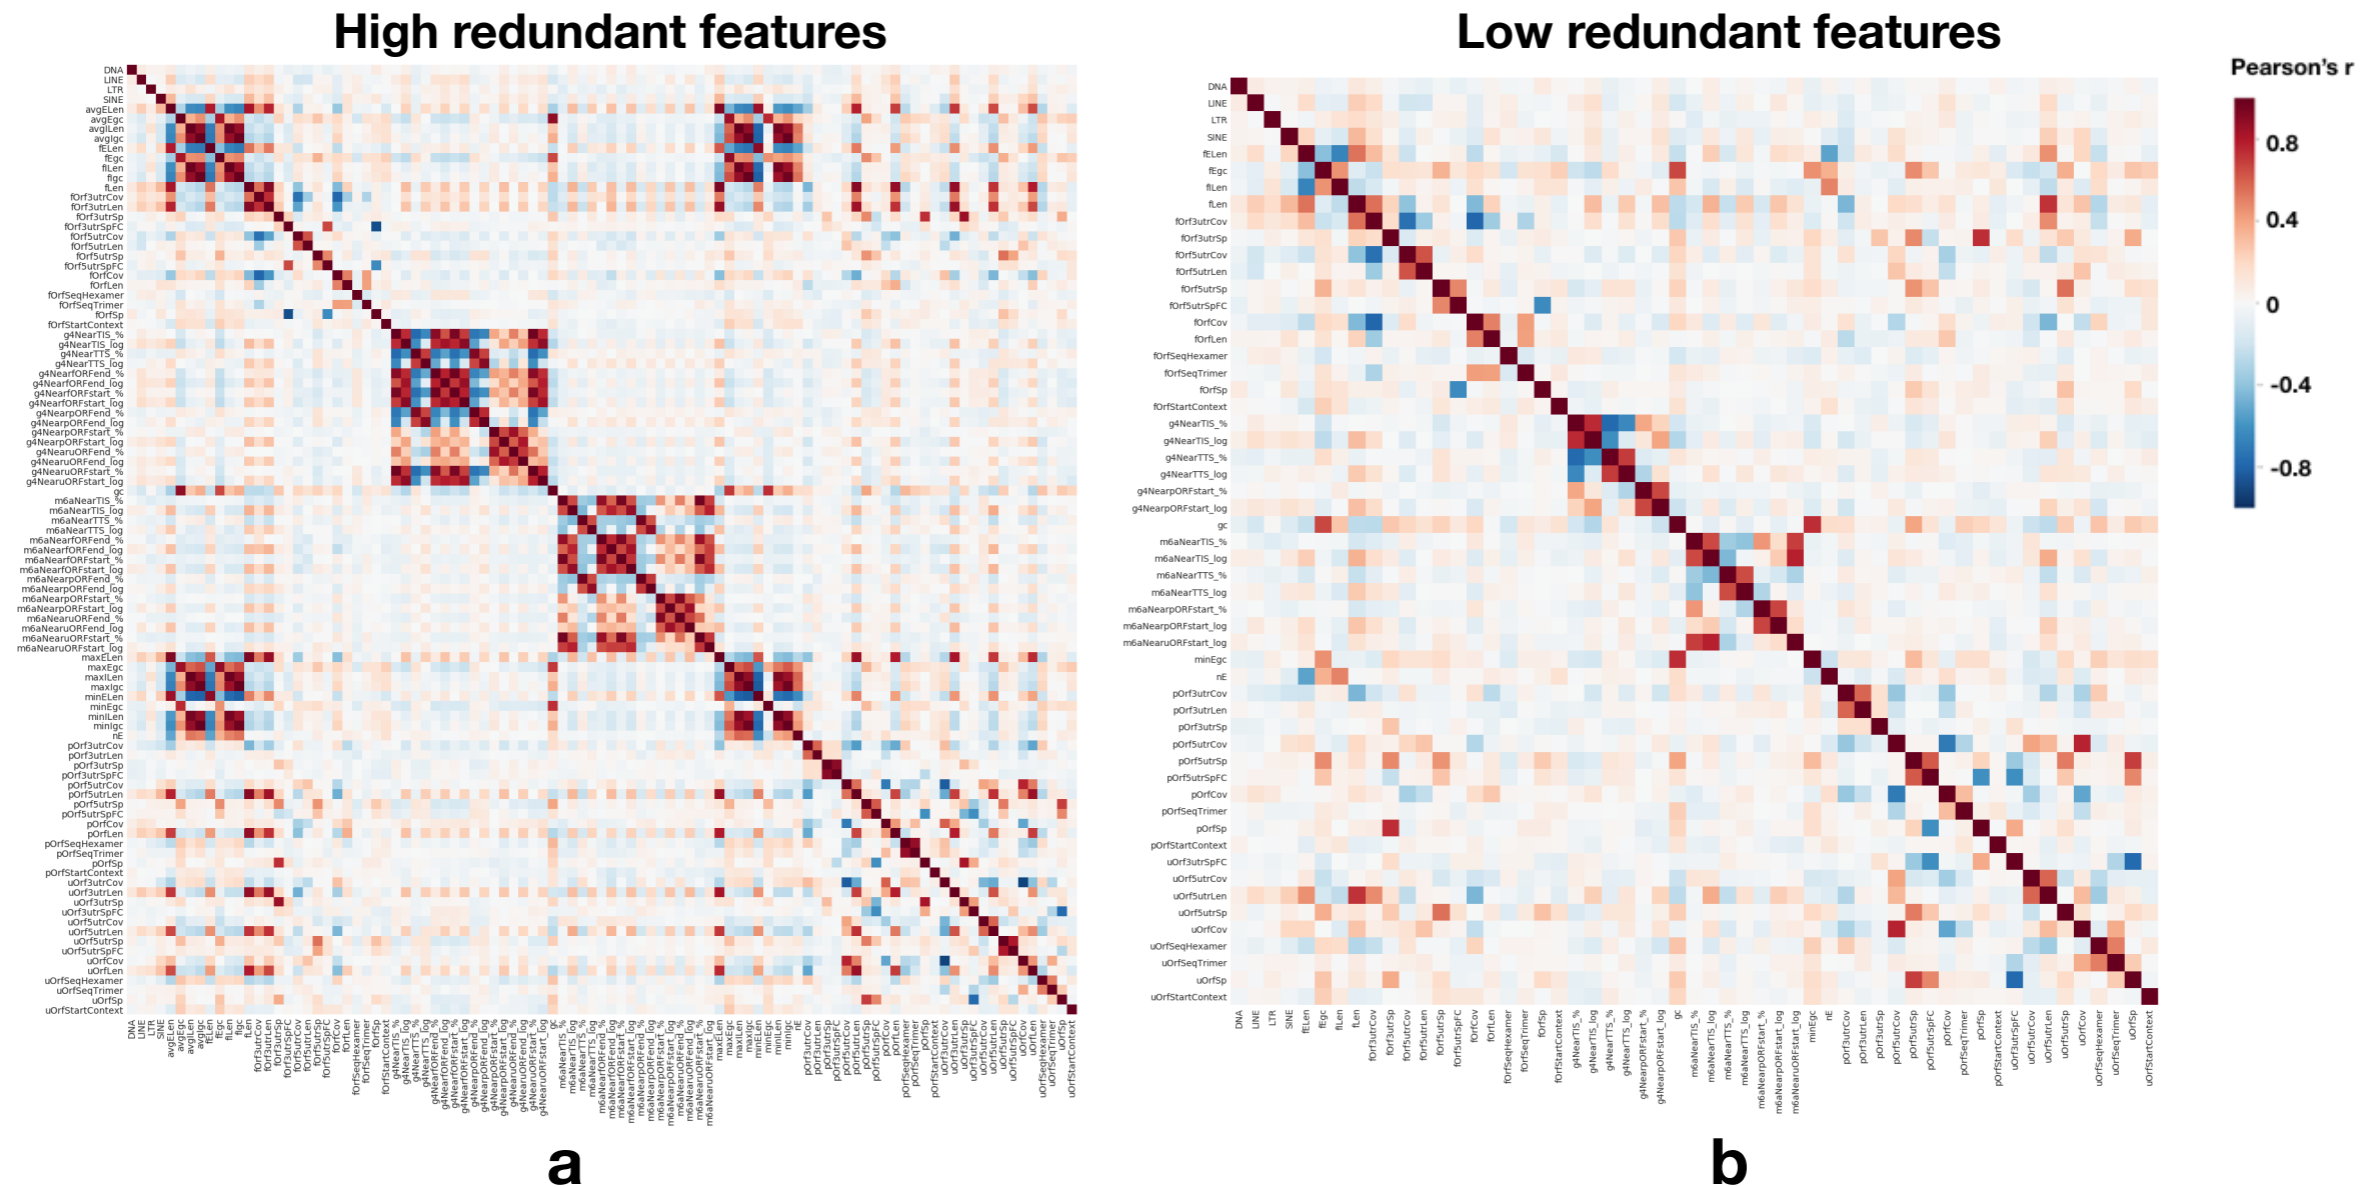

**Figure S4** Correlations ( $r$ ) of features indicates redundant features in mouse. **a** Correlations of all extracted features shows that features of several sub-regions are highly correlated (redundant). **b** After removing high redundant ( $|r| > 0.8$ ) features, we obtained a low redundant feature set for further analysis in this study.



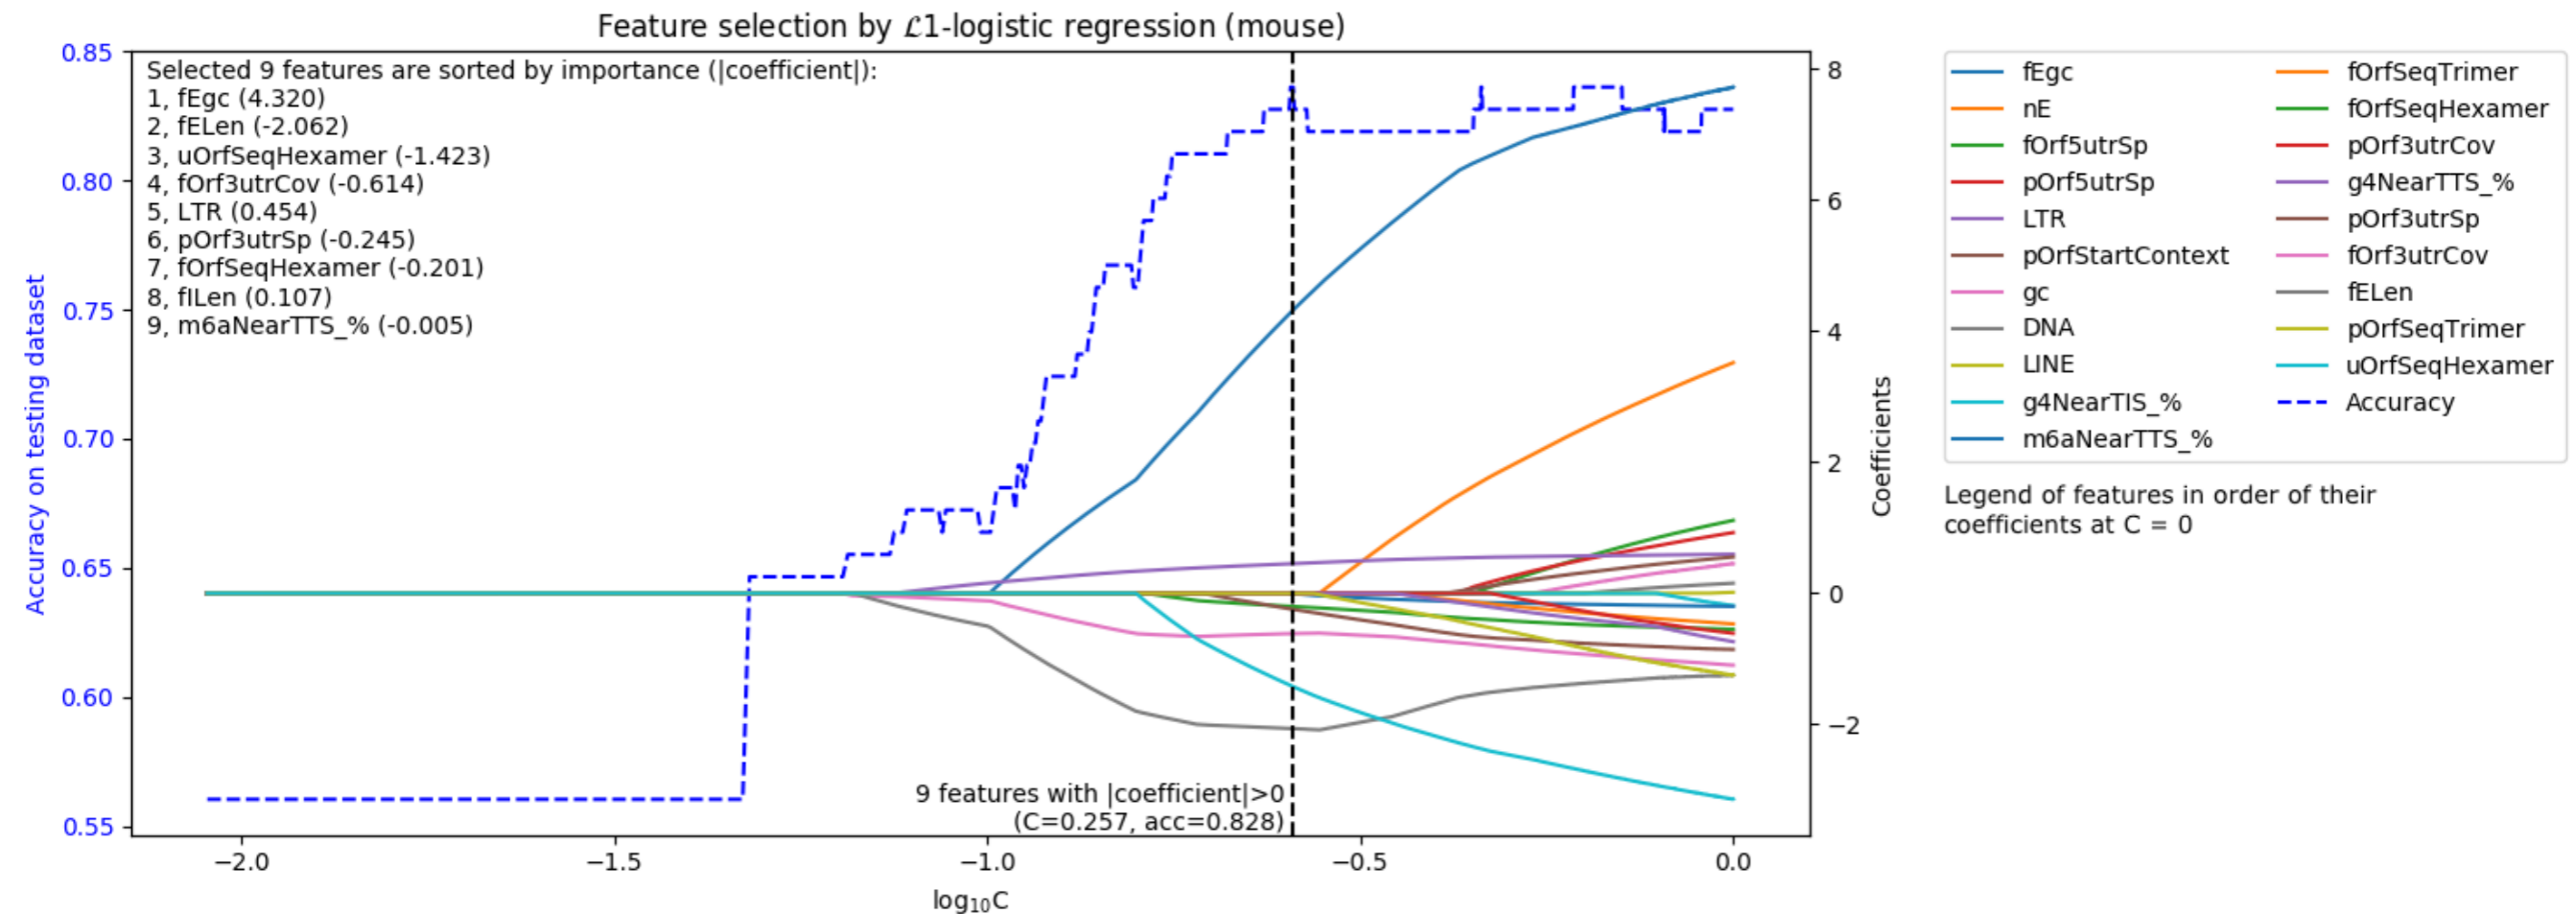

**Figure S5** Feature selection by using  $\mathcal{L}_1$ -logistic regression in mouse. Total data was separated into 80% for training the model and 20% for the calculation of accuracy (blue dashed line, left y-axis). On the x-axis,  $C$  indicates the inverse of regularization strength. As  $C$  is increased, the number of features with non-zero coefficients (right y-axis) is increased and the model becomes more complicated. The black dashed line shows the final model chosen in this study, and outputs 9 features with non-zero coefficients. These features were ranked by the absolute value of coefficient, which represents the importance for prediction, and shown in the upper left.



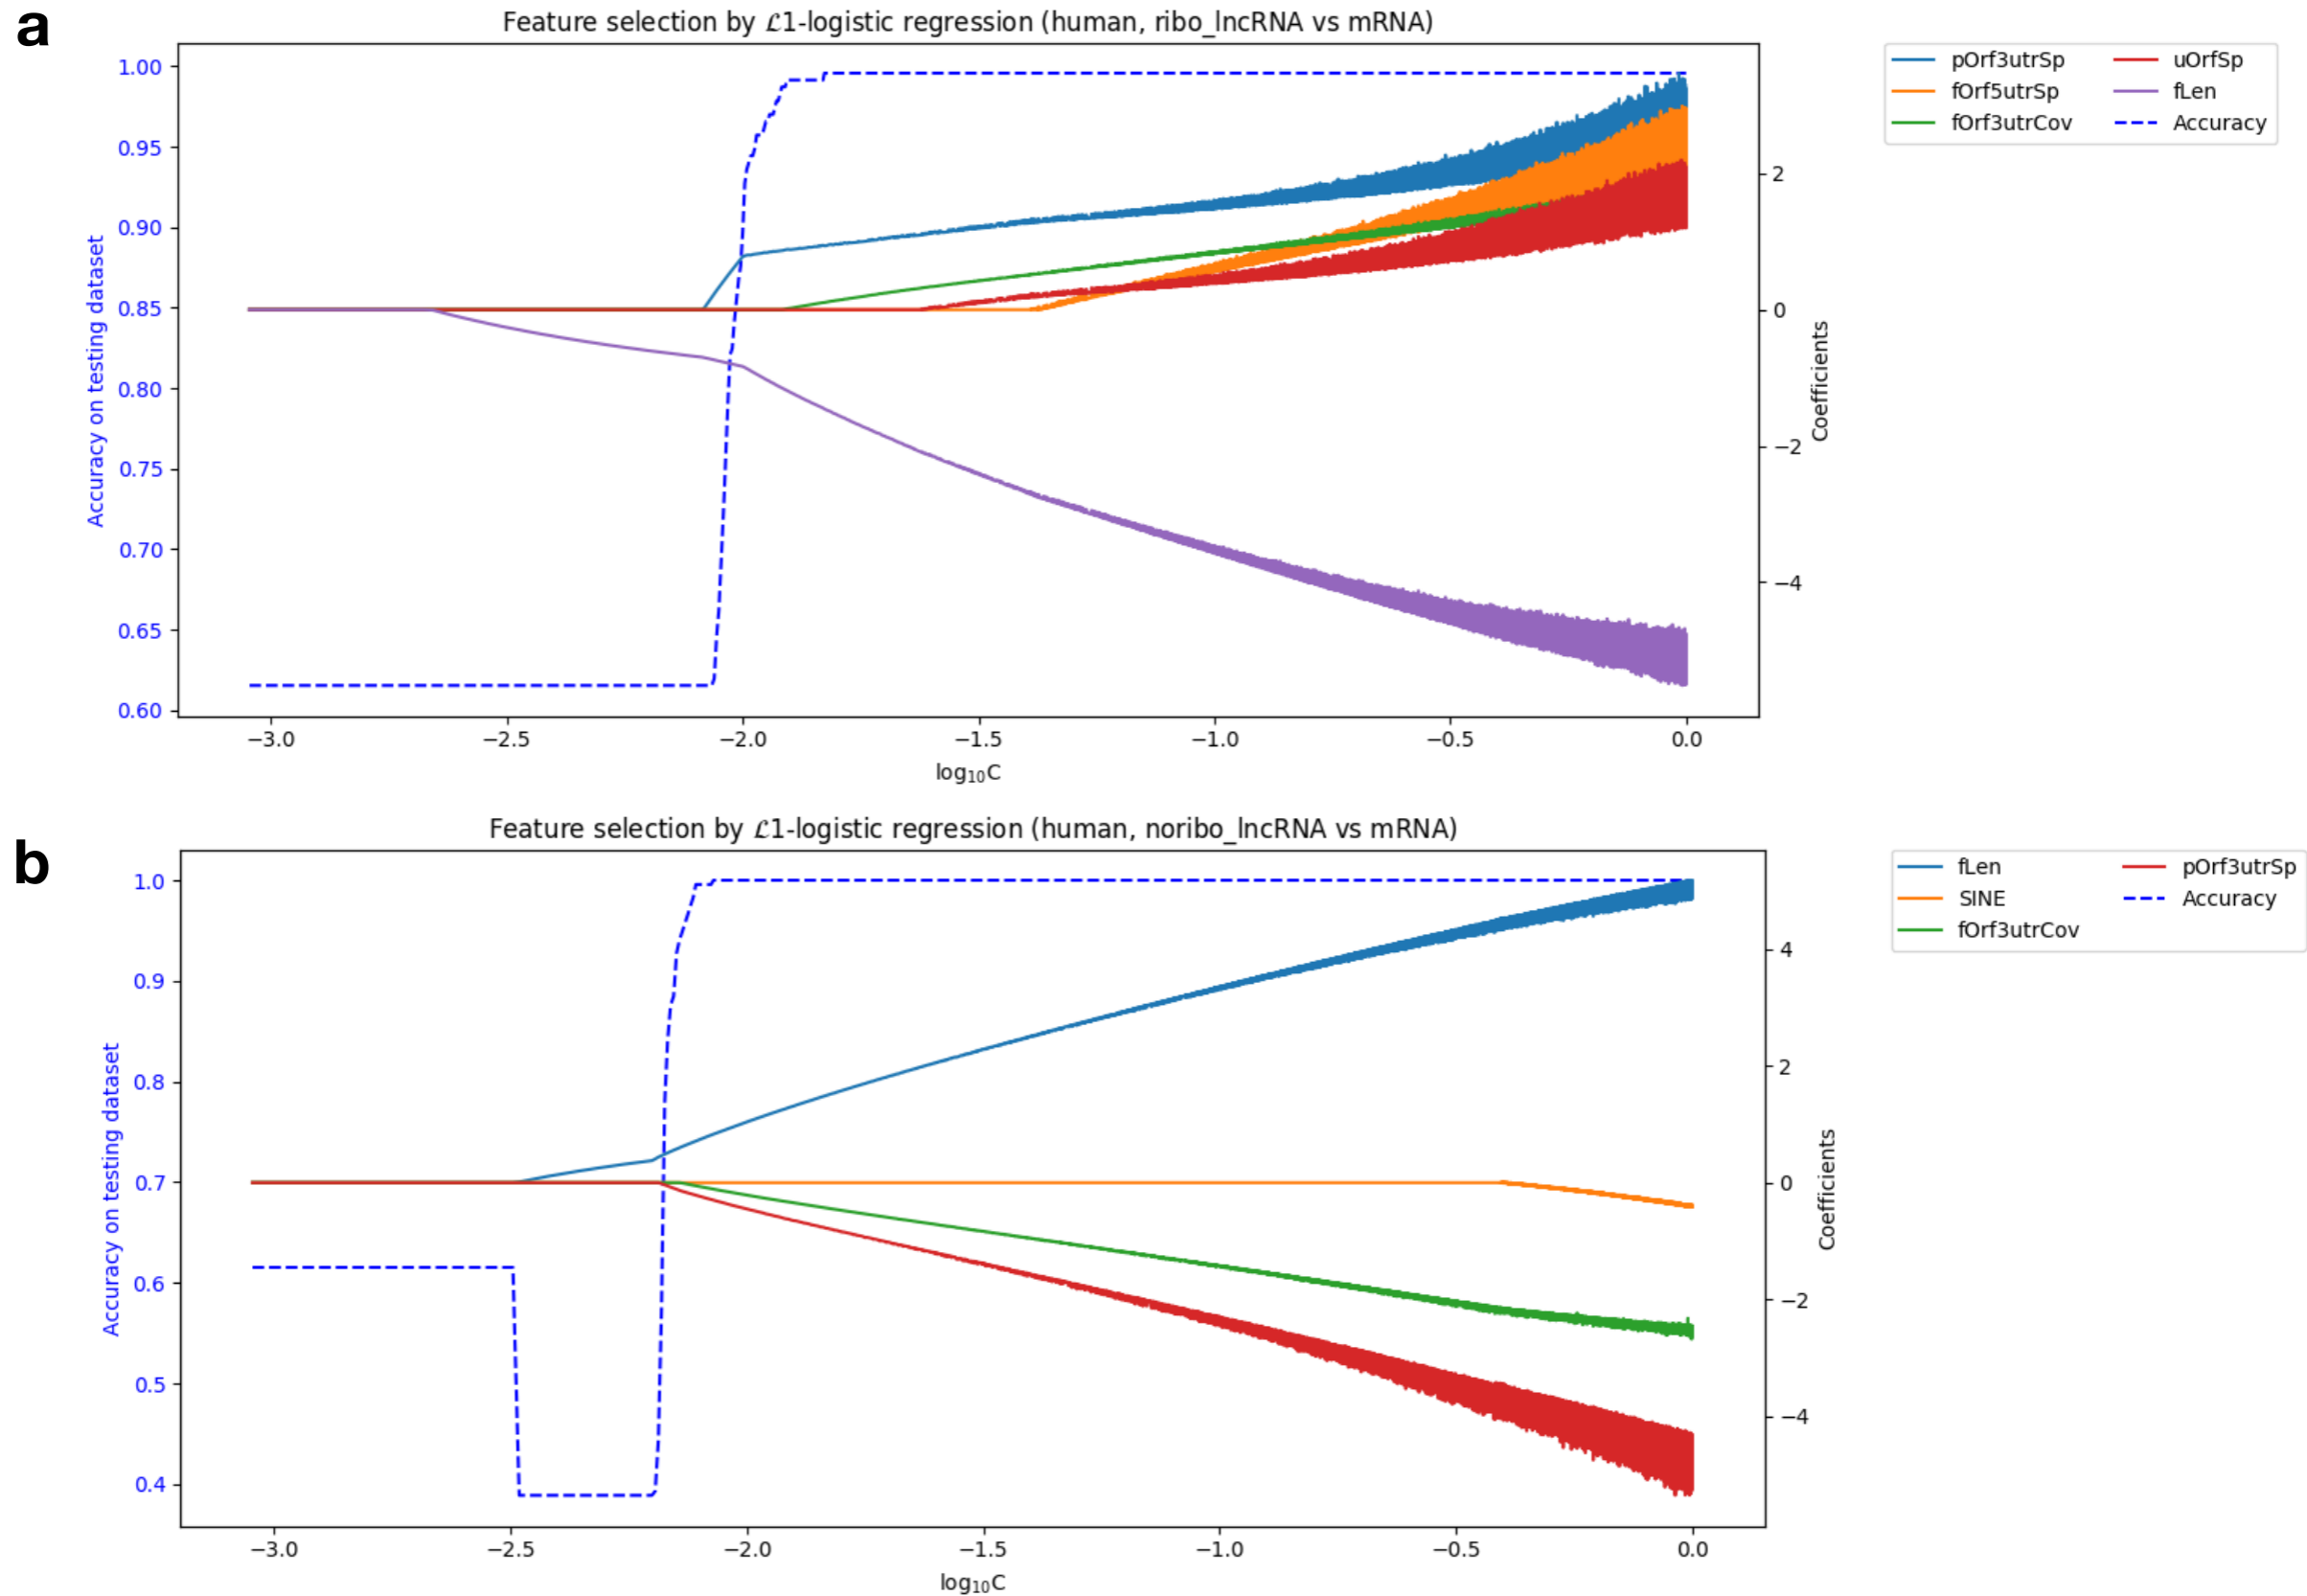

**Figure S6** Training  $\mathcal{L}_1$ -logistic regression model on the dataset of **a** ribo-lncRNAs and mRNAs; **b** noribo-lncRNAs and mRNAs in human.

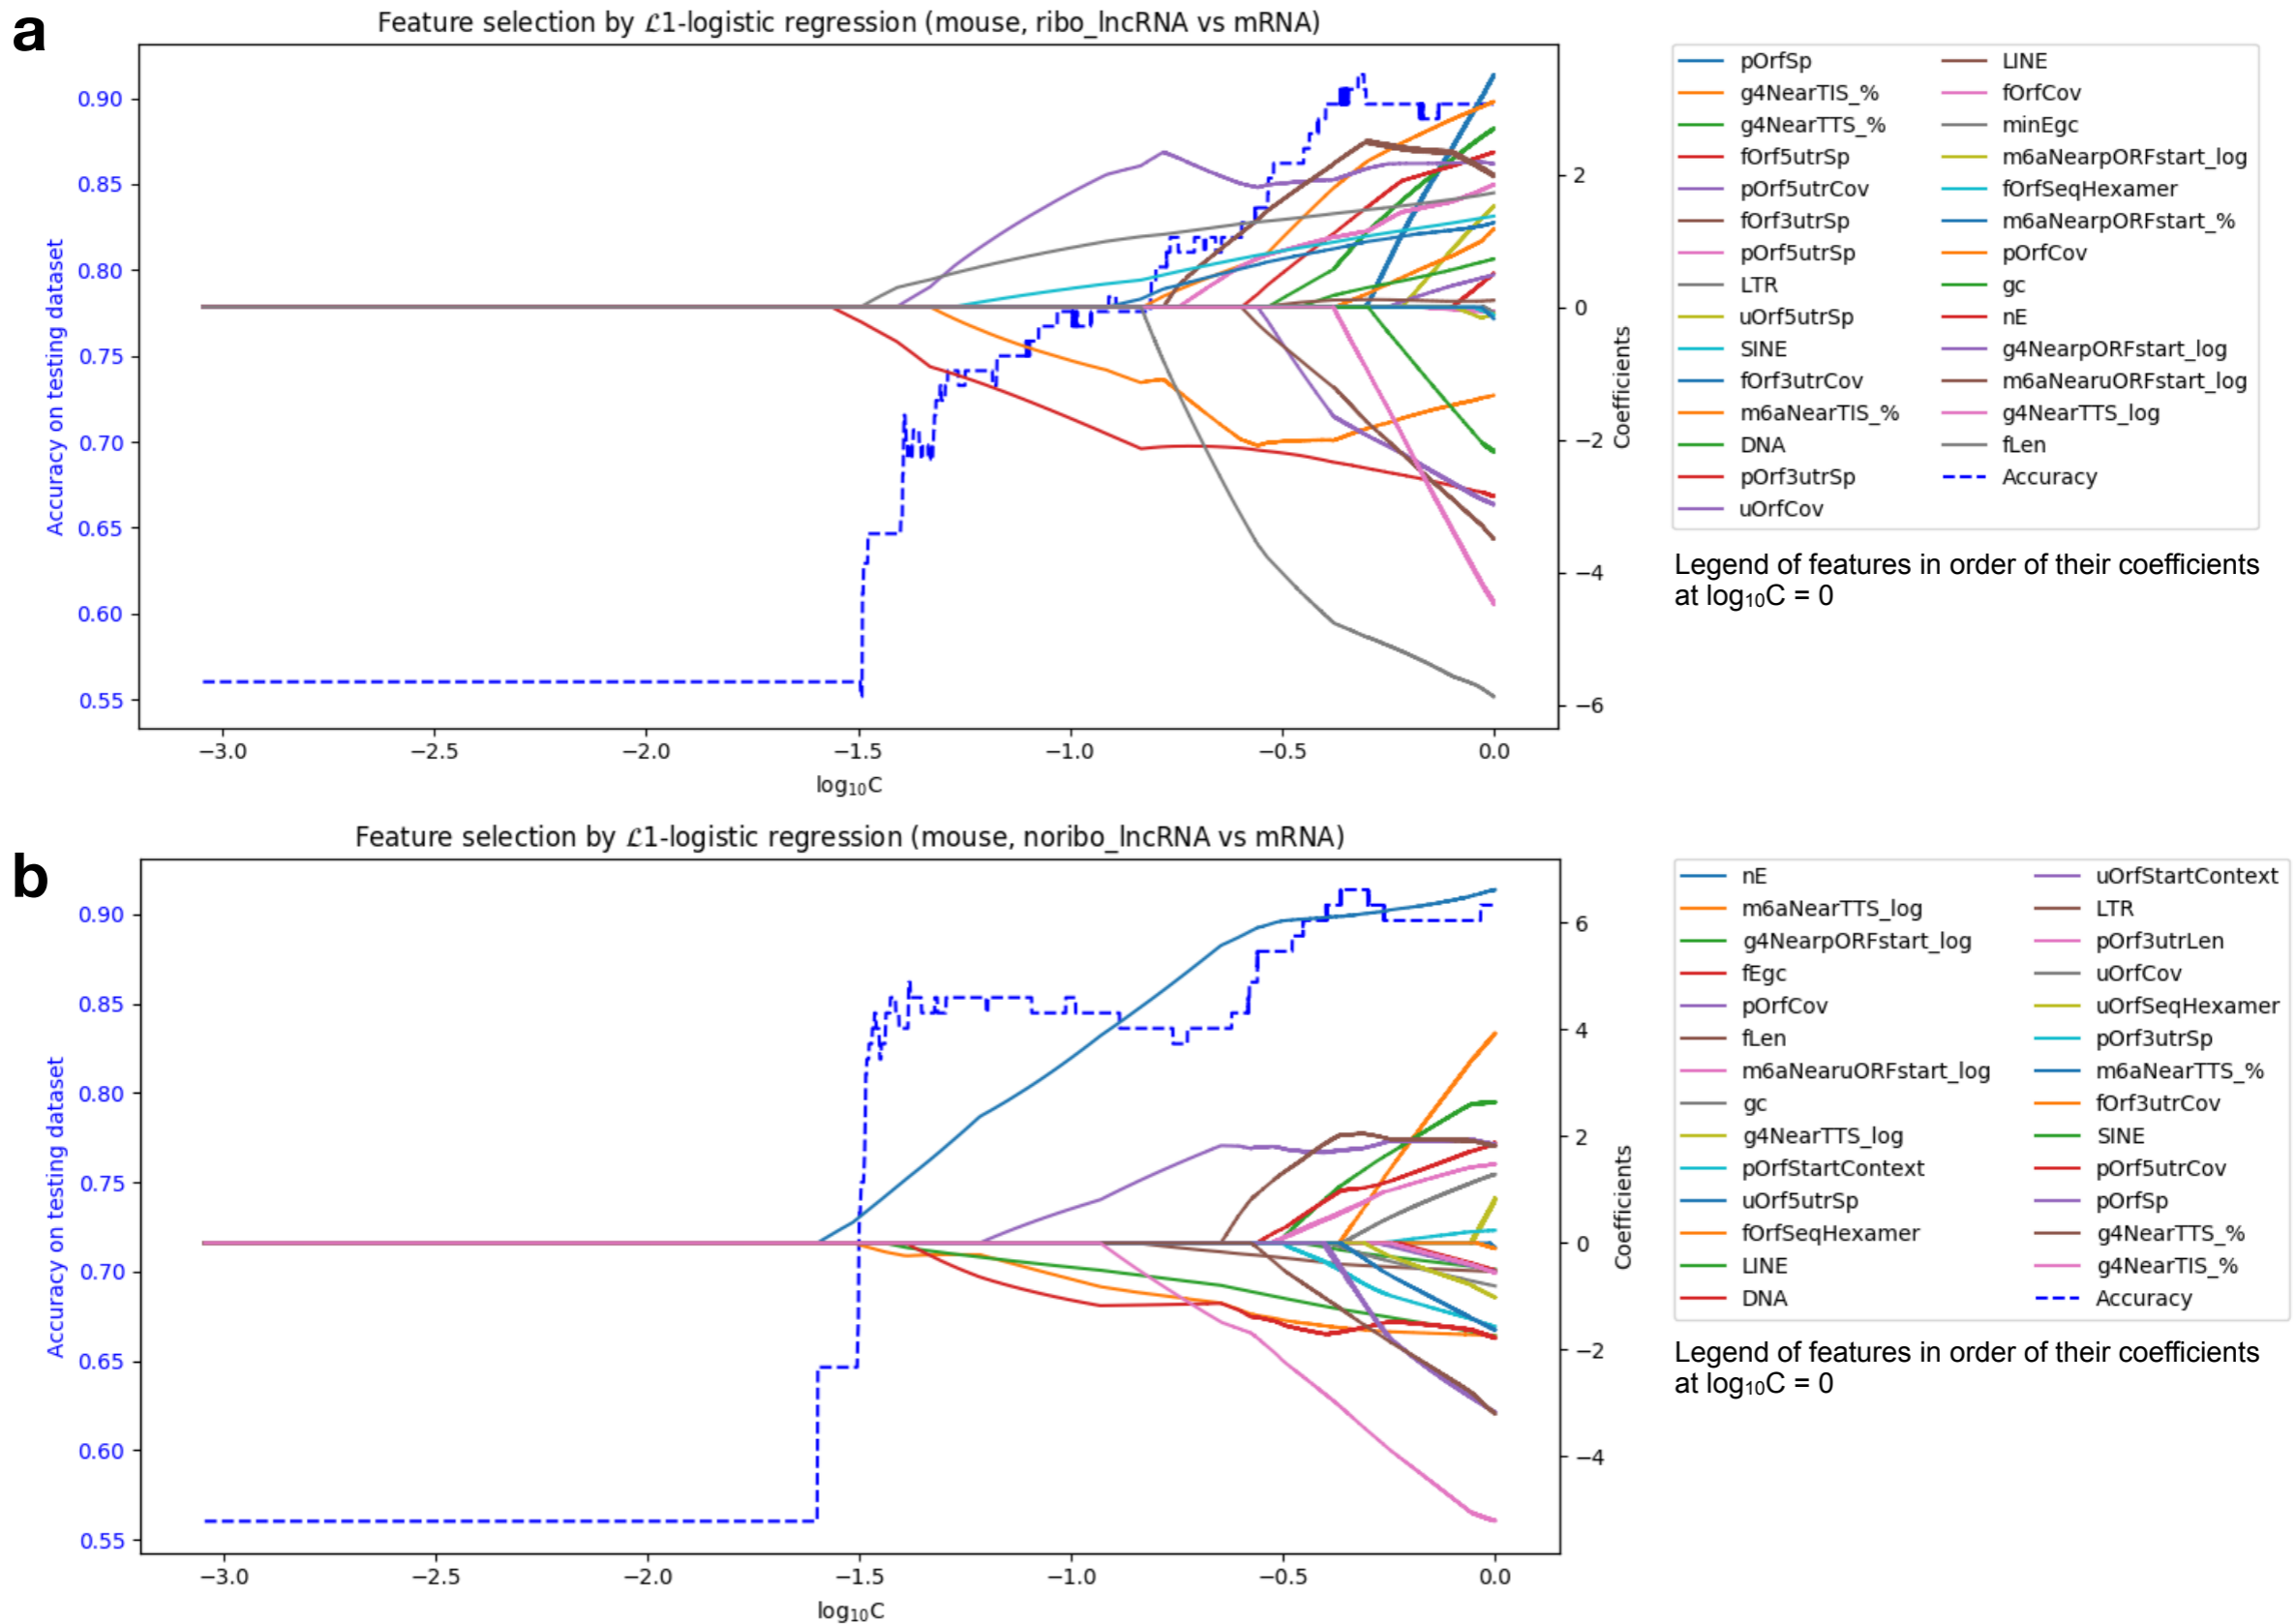

**Figure S7** Training  $\mathcal{L}_1$ -logistic regression model on the dataset of **a** ribo-lncRNAs and mRNAs; **b** noribo-lncRNAs and mRNAs in mouse.

**Table S1. Sequence features were considered to influence the ribosomal association.**

| No.                                                                          | Feature              | Description                                                                   |
|------------------------------------------------------------------------------|----------------------|-------------------------------------------------------------------------------|
| <b>Basic</b>                                                                 |                      |                                                                               |
| 1                                                                            | fLen                 | $\text{Log}_{10}(\text{length}+1)$ of the mature lncRNA                       |
| 2                                                                            | gc                   | G+C content of the mature lncRNA                                              |
| <b>RNA splicing</b>                                                          |                      |                                                                               |
| 3                                                                            | nE                   | Number of exons                                                               |
| 4                                                                            | fELen                | $\text{Log}_{10}(\text{length}+1)$ of the first exon                          |
| 5                                                                            | minELen              | $\text{Log}_{10}(\text{length}+1)$ of the shortest exon                       |
| 6                                                                            | maxELen              | $\text{Log}_{10}(\text{length}+1)$ of the longest exon                        |
| 7                                                                            | avgELen              | $\text{Log}_{10}(\text{averaged\_length}+1)$ of exons                         |
| 8                                                                            | fEgc                 | G+C content of the first exon                                                 |
| 9                                                                            | minEgc               | G+C content of the shortest exon                                              |
| 10                                                                           | maxEgc               | G+C content of the longest exon                                               |
| 11                                                                           | avgEgc               | Averaged G+C content of exons                                                 |
| 12                                                                           | fILen                | $\text{Log}_{10}(\text{length}+1)$ of the first intron                        |
| 13                                                                           | minILen              | $\text{Log}_{10}(\text{length}+1)$ of the shortest intron                     |
| 14                                                                           | maxILen              | $\text{Log}_{10}(\text{length}+1)$ of the longest intron                      |
| 15                                                                           | avgILen              | $\text{Log}_{10}(\text{averaged\_length}+1)$ of introns                       |
| 16                                                                           | flgc                 | G+C content of the first intron                                               |
| 17                                                                           | minlgc               | G+C content of the shortest intron                                            |
| 18                                                                           | maxlgc               | G+C content of the longest intron                                             |
| 19                                                                           | avglgc               | Averaged G+C content of introns                                               |
| <b>Putative ORF (pORF: primary ORF; fORF: first ORF; uORF: upstream ORF)</b> |                      |                                                                               |
| 20-22                                                                        | p/f/uOrfLen          | $\text{Log}_{10}(\text{length} + 1)$ of ORF                                   |
| 23-25                                                                        | p/f/uOrfCov          | Percentage of ORF length compared to that of lncRNA                           |
| 26-28                                                                        | p/f/uOrf5utrLen      | $\text{Log}_{10}(\text{length} + 1)$ of the upstream region of ORF (5' UTR)   |
| 29-31                                                                        | p/f/uOrf5utrCov      | Percentage of the 5' UTR length compared to that of lncRNA                    |
| 32-34                                                                        | p/f/uOrf3utrLen      | $\text{Log}_{10}(\text{length} + 1)$ of the downstream region of ORF (3' UTR) |
| 35-37                                                                        | p/f/uOrf3utrCov      | Percentage of the 3' UTR length compared to that of lncRNA                    |
| <b>K-mer frequency</b>                                                       |                      |                                                                               |
| 38-40                                                                        | p/f/uOrfStartContext | Context score of ORF start                                                    |
| 41-43                                                                        | p/f/uOrfSeqTrimer    | Trimer score of ORF                                                           |

**Table S1. Sequence features (continued).**

| No.                            | Feature                    | Description                                                                             |
|--------------------------------|----------------------------|-----------------------------------------------------------------------------------------|
| 44-46                          | p/f/uOrfSeqHexamer         | Hexamer score of ORF                                                                    |
| <b>RNA secondary structure</b> |                            |                                                                                         |
| 47-49                          | p/f/uOrfSp                 | Averaged RNA stem probability of ORF                                                    |
| 50-52                          | p/f/uOrf5utrSp             | Averaged RNA stem probability of 5' UTR                                                 |
| 53-55                          | p/f/uOrf5utrSpFC           | Ratio of RNA stem probability of 5'UTR to that of ORF                                   |
| 56-58                          | p/f/uOrf3utrSp             | Averaged RNA stem probability of 3' UTR                                                 |
| 59-61                          | p/f/uOrf3utrSpFC           | Ratio of RNA stem probability of 3'UTR to that of ORF                                   |
| 62                             | g4NearTIS_log              | Log <sub>10</sub> (minimum distance) from G4 to transcription initiation                |
| 63                             | g4NearTTS_log              | Log <sub>10</sub> (minimum distance) from G4 to transcription termination               |
| 64-66                          | g4Near(p/f/u)ORFstart_log  | Log <sub>10</sub> (minimum distance) from G4 to ORF start                               |
| 67-69                          | g4Near(p/f/u)ORFend_log    | Log <sub>10</sub> (minimum distance) from G4 to ORF end                                 |
| 70                             | g4NearTIS_%                | Minimum distance from G4 to TIS divided by length of lncRNA                             |
| 71                             | g4NearTTS_%                | Minimum distance from G4 to TTS divided by length of lncRNA                             |
| 72-74                          | g4Near(p/f/u)ORFstart_%    | Minimum distance from G4 to ORF start divided by length of lncRNA                       |
| 75-77                          | g4Near(p/f/u)ORFend_%      | Minimum distance from G4 to ORF end divided by length of lncRNA                         |
| <b>RNA modification</b>        |                            |                                                                                         |
| 78                             | m6aNearTIS_log             | Log <sub>10</sub> (minimum distance) from m <sup>6</sup> A to transcription initiation  |
| 79                             | m6aNearTTS_log             | Log <sub>10</sub> (minimum distance) from m <sup>6</sup> A to transcription termination |
| 80-82                          | m6aNear(p/f/u)ORFstart_log | Log <sub>10</sub> (minimum distance) from m <sup>6</sup> A to ORF start                 |
| 83-85                          | m6aNear(p/f/u)ORFend_log   | Log <sub>10</sub> (minimum distance) from m <sup>6</sup> A to ORF end                   |
| 86                             | m6aNearTIS_%               | Minimum distance from m <sup>6</sup> A to TIS divided by length of lncRNA               |
| 87                             | m6aNearTTS_%               | Minimum distance from m <sup>6</sup> A to TTS divided by length of lncRNA               |
| 88-90                          | m6aNear(p/f/u)ORFstart_%   | Minimum distance from m <sup>6</sup> A to ORF start divided by length of lncRNA         |
| 91-93                          | m6aNear(p/f/u)ORFend_%     | Minimum distance from m <sup>6</sup> A to ORF end divided by length of lncRNA           |
| <b>Repeat element</b>          |                            |                                                                                         |
| 94                             | DNA                        | Containing DNA transposon or not                                                        |
| 95                             | LINE                       | Containing LINE element or not                                                          |
| 96                             | LTR                        | Containing LTR element or not                                                           |
| 97                             | SINE                       | Containing SINE element or not                                                          |
| 98                             | Retroposon                 | Containing Retroposon element or not                                                    |
| 99                             | Satellite                  | Containing Satellite element or not                                                     |

**Table S2. Low-redundant features in human and mouse.**

| No. | Human        | Mouse        | No. | Human                | Mouse                |
|-----|--------------|--------------|-----|----------------------|----------------------|
| 1   | fLen         | fLen         | 31  | DNA                  | DNA                  |
| 2   | gc           | gc           | 32  | LINE                 | LINE                 |
| 3   | nE           | nE           | 33  | LTR                  | LTR                  |
| 4   | fELen        | fELen        | 34  | Retroposon           | SINE                 |
| 5   | fEgc         | fEgc         | 35  | SINE                 | m6aNearTIS_log       |
| 6   | flLen        | minEgc       | 36  | Satellite            | m6aNearTTS_log       |
| 7   | pOrfCov      | flLen        | 37  | m6aNearTIS_log       | m6aNearpORFstart_log |
| 8   | pOrfSp       | pOrfCov      | 38  | m6aNearTTS_log       | m6aNearuORFstart_log |
| 9   | pOrf5utrCov  | pOrfSp       | 39  | m6aNearpORFstart_log | g4NearTIS_log        |
| 10  | pOrf5utrSp   | pOrf5utrCov  | 40  | m6aNearuORFstart_log | g4NearTTS_log        |
| 11  | pOrf5utrSpFC | pOrf5utrSp   | 41  | g4NearTIS_log        | g4NearpORFstart_log  |
| 12  | pOrf3utrLen  | pOrf5utrSpFC | 42  | g4NearTTS_log        | m6aNearTIS_%         |
| 13  | pOrf3utrCov  | pOrf3utrLen  | 43  | g4NearpORFstart_log  | m6aNearTTS_%         |
| 14  | pOrf3utrSp   | pOrf3utrCov  | 44  | g4NearORFend_log     | m6aNearpORFstart_%   |
| 15  | fOrfLen      | pOrf3utrSp   | 45  | m6aNearTIS_%         | g4NearTIS_%          |
| 16  | fOrfCov      | fOrfLen      | 46  | m6aNearTTS_%         | g4NearTTS_%          |
| 17  | fOrfSp       | fOrfCov      | 47  | m6aNearpORFstart_%   | g4NearpORFstart_%    |
| 18  | fOrf5utrLen  | fOrfSp       | 48  | g4NearTIS_%          | pOrfStartContext     |
| 19  | fOrf5utrCov  | fOrf5utrLen  | 49  | g4NearTTS_%          | fOrfStartContext     |
| 20  | fOrf5utrSp   | fOrf5utrCov  | 50  | g4NearpORFstart_%    | uOrfStartContext     |
| 21  | fOrf5utrSpFC | fOrf5utrSp   | 51  | pOrfStartContext     | pOrfSeqTrimer        |
| 22  | fOrf3utrCov  | fOrf5utrSpFC | 52  | fOrfStartContext     | fOrfSeqTrimer        |
| 23  | fOrf3utrSp   | fOrf3utrCov  | 53  | uOrfStartContext     | fOrfSeqHexamer       |
| 24  | uOrfCov      | fOrf3utrSp   | 54  | pOrfSeqTrimer        | uOrfSeqTrimer        |
| 25  | uOrfSp       | uOrfCov      | 55  | pOrfSeqHexamer       | uOrfSeqHexamer       |
| 26  | uOrf5utrLen  | uOrfSp       | 56  | fOrfSeqTrimer        |                      |
| 27  | uOrf5utrCov  | uOrf5utrLen  | 57  | fOrfSeqHexamer       |                      |
| 28  | uOrf5utrSp   | uOrf5utrCov  | 58  | uOrfSeqTrimer        |                      |
| 29  | uOrf5utrSpFC | uOrf5utrSp   | 59  | uOrfSeqHexamer       |                      |
| 30  | uOrf3utrSpFC | uOrf3utrSpFC |     |                      |                      |
